# Supplementary material for: Sensitization of NIR luminescence of Yb3+ by Zn2+ chromophores in heterometallic complexes with a bridging Schiff-base ligand
Source: Royal Society of Chemistry journal article supplement (doi:10.1039/c7dt01340j), 2017-01-01
Supplement: c7dt01340j1.pdf [file c7dt01340j1.pdf]

## Supplementary Information

### Sensitization of NIR luminescence of Yb<sup>3+</sup> by Zn<sup>2+</sup> chromophores in heterometallic complexes with bridging Schiff-base ligand

Anatoly P. Pushkarev,<sup>\*ad</sup> Tatyana V. Balashova,<sup>a</sup> Andrey A. Kukinov,<sup>b</sup> Maxim V. Arsenyev,<sup>ab</sup> Artem N. Yablonskiy,<sup>bc</sup> Denis I. Kryzhkov,<sup>bc</sup> Boris A. Andreev,<sup>bc</sup> Roman V. Rumyantsev,<sup>a</sup> Georgy K. Fukin<sup>a</sup> and Mikhail N. Bochkarev<sup>\*ab</sup>

<sup>a</sup> G. A. Razuvaev Institute of Organometallic Chemistry of Russian Academy of Sciences, Tropinina 49, 603950 Nizhny Novgorod, Russian Federation. E-mail: [pushkarev@iomc.ras.ru](mailto:pushkarev@iomc.ras.ru), [mboch@iomc.ras.ru](mailto:mboch@iomc.ras.ru); Fax: +7 (831) 4627497; Tel: +7 (831) 4627709

<sup>b</sup> Nizhny Novgorod State University, Gagarina avenue 23/2, 603950 Nizhny Novgorod, Russian Federation

<sup>c</sup> Institute for Physics of Microstructures of Russian Academy of Sciences, 7 ul. Akademicheskaya, 603950 Nizhny Novgorod, Russian Federation

<sup>d</sup> Department of Nanophotonics and Metamaterials, ITMO University, 197101 St. Petersburg, Russian Federation

**Table S1.** Details of crystallographic, collection and refinement data for complexes **1-4**.

| Complex                  | <b>1 + 2</b>                                                                                                    | <b>3</b>                                                                                                       | <b>4</b>                                                                       |
|--------------------------|-----------------------------------------------------------------------------------------------------------------|----------------------------------------------------------------------------------------------------------------|--------------------------------------------------------------------------------|
| Empirical formula        | C <sub>106</sub> H <sub>82</sub> F <sub>36</sub> N <sub>8</sub> O <sub>24</sub> Yb <sub>2</sub> Zn <sub>4</sub> | C <sub>60</sub> H <sub>48</sub> F <sub>24</sub> N <sub>6</sub> O <sub>14</sub> Yb <sub>2</sub> Zn <sub>2</sub> | C <sub>66</sub> H <sub>56</sub> N <sub>6</sub> O <sub>13</sub> Yb <sub>2</sub> |
| Formula weight           | 3143.35                                                                                                         | 2009.86                                                                                                        | 1487.24                                                                        |
| Temperature [K]          | 100(2)                                                                                                          | 100(2)                                                                                                         | 100(2)                                                                         |
| Crystal system           | Monoclinic                                                                                                      | Monoclinic                                                                                                     | Monoclinic                                                                     |
| Space group              | P2 <sub>1</sub> /n                                                                                              | P2 <sub>1</sub> /n                                                                                             | P2 <sub>1</sub> /n                                                             |
| Unit cell dimensions     |                                                                                                                 |                                                                                                                |                                                                                |
| a[Å]                     | 18.1681(5)                                                                                                      | 15.4896(2)                                                                                                     | 13.1157(5)                                                                     |
| b[Å]                     | 13.5223(4)                                                                                                      | 21.0187(2)                                                                                                     | 19.4737(7)                                                                     |
| c[Å]                     | 22.7668(7)                                                                                                      | 22.5205(2)                                                                                                     | 23.2334(3)                                                                     |
| α[°]                     | 90                                                                                                              | 90                                                                                                             | 90                                                                             |
| β[°]                     | 96.9370(10)                                                                                                     | 109.7990(10)                                                                                                   | 99.043(2)                                                                      |
| γ[°]                     | 90                                                                                                              | 90                                                                                                             | 90                                                                             |
| Volume [Å <sup>3</sup> ] | 5552.3(3)                                                                                                       | 6898.60(13)                                                                                                    | 5860.3(3)                                                                      |

| Z                                               | 2                                               | 4                                               | 4                                               |
|-------------------------------------------------|-------------------------------------------------|-------------------------------------------------|-------------------------------------------------|
| Calculated density [Mg/m <sup>3</sup> ]         | 1.880                                           | 1.935                                           | 1.686                                           |
| Absorption coefficient [mm <sup>-1</sup> ]      | 2.655                                           | 3.505                                           | 3.244                                           |
| Crystal size [mm]                               | 0.340×0.18×0.10                                 | 0.30×0.15×0.10                                  | 0.40×0.20×0.20                                  |
| $\theta$ [°]                                    | 1.802 - 29.130                                  | 2.900 - 30.508                                  | 3.021 - 28.000                                  |
| Reflections collected / unique                  | 60046 / 14939                                   | 142215 / 21020                                  | 32714 / 14043                                   |
| R <sub>int</sub>                                | 0.0266                                          | 0.0304                                          | 0.0249                                          |
| Final R indices [I>2sigma(I)]                   | R <sub>1</sub> =0.0348, wR <sub>2</sub> =0.0829 | R <sub>1</sub> =0.0227, wR <sub>2</sub> =0.0507 | R <sub>1</sub> =0.0246, wR <sub>2</sub> =0.0473 |
| R indices (all data)                            | R <sub>1</sub> =0.0406, wR <sub>2</sub> =0.0882 | R <sub>1</sub> =0.0298, wR <sub>2</sub> =0.0529 | R <sub>1</sub> =0.0366, wR <sub>2</sub> =0.0498 |
| S                                               | 1.033                                           | 1.053                                           | 1.024                                           |
| Largest diff. peak and hole [e/Å <sup>3</sup> ] | 2.017 / -1.103                                  | 0.933 / -0.748                                  | 0.723 / -0.661                                  |

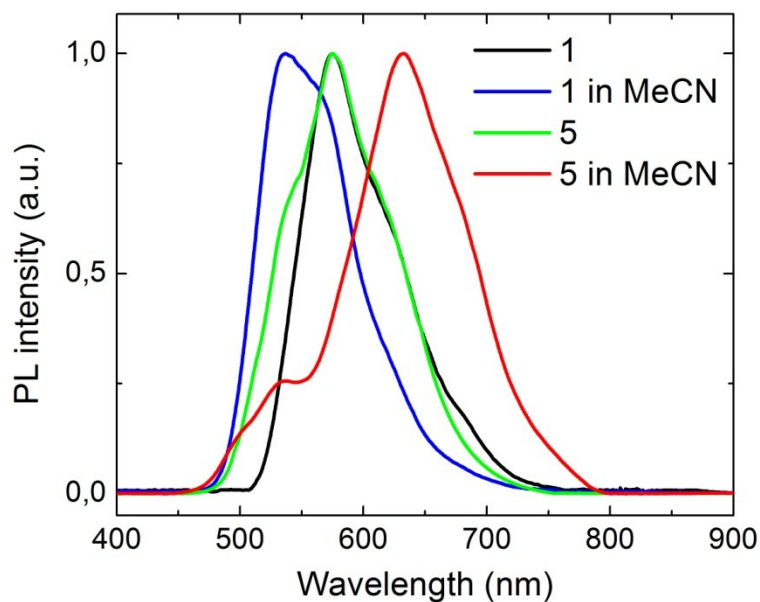

**Fig. S1.** PL spectra of **1** and **5** in solid state and MeCN solution under 380 nm excitation at room temperature.

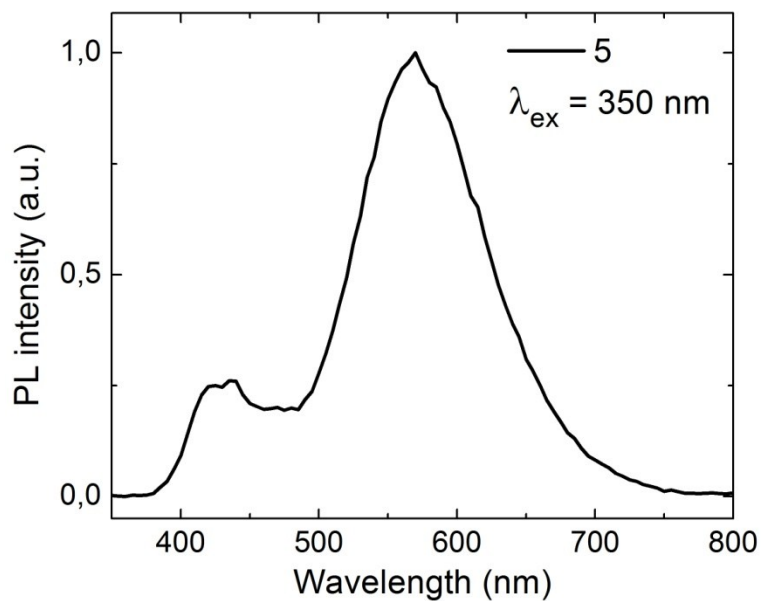

**Fig. S2.** PL of **5** under 350 nm excitation. The band at ca. 440 nm was observed for all complexes and corresponds to  $^1S_1 \rightarrow ^1S_0$  transition in the Schiff-base.

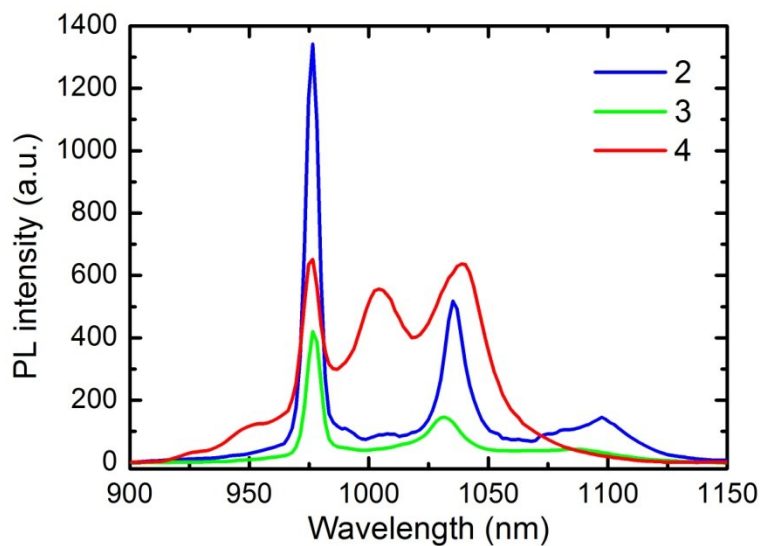

**Fig. S3.** NIR PL of ytterbium complexes **2-4** in MeCN solution (O.D. = 0.1 at 405 nm) under 405 nm laser diode excitation.

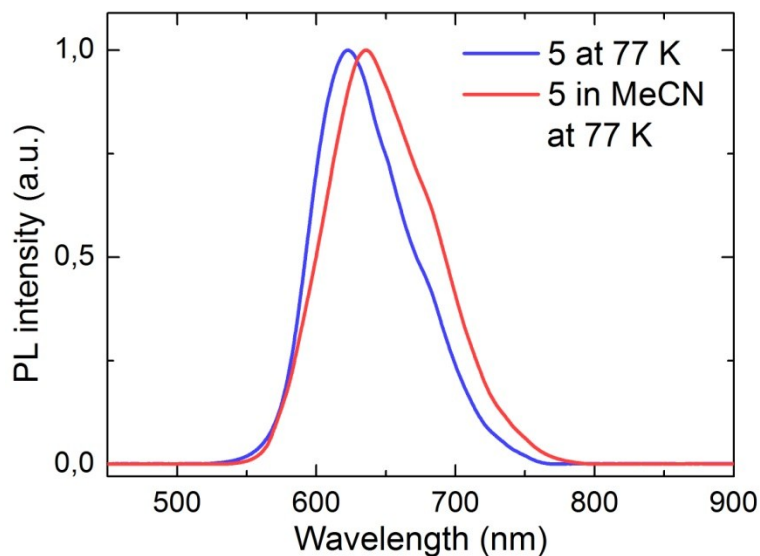

**Fig. S4.** Phosphorescence spectra of the Gd derivative **5** in solid state and MeCN solution at 77K.

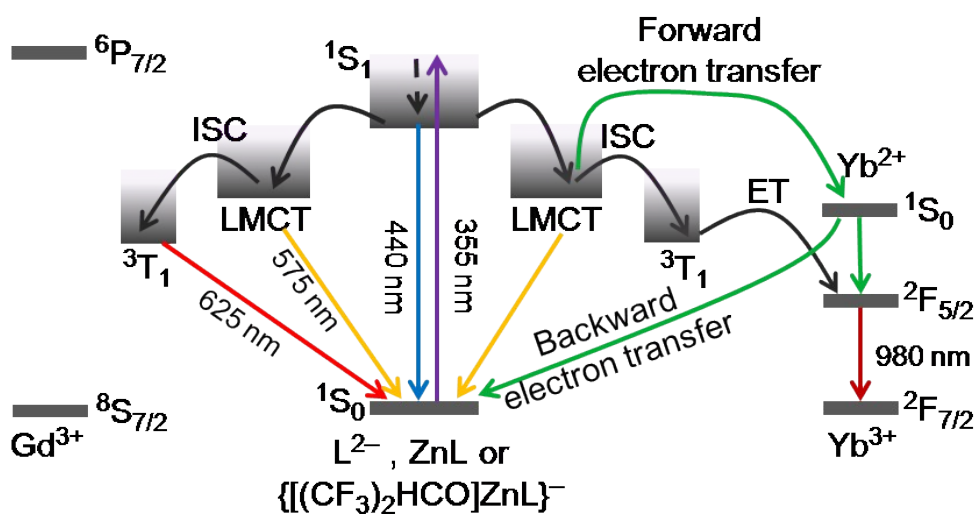

**Fig. S5.** Energy diagram showing transfer of excitation energy in the complexes **2-5**.
